# Supplementary material for: Splicing oxygen-rich multidentate ligands and characteristic metals to construct flame colorants: abundant structures and attractive colors
Source: Royal Society of Chemistry journal article supplement (doi:10.1039/d3dt00470h), 2023-01-01
Supplement: d3dt00470h1.pdf [file d3dt00470h1.pdf]

## Electronic Supplementary Information

### Splicing oxygen-rich multidentate ligand and characteristic metals to construct flame colorants: abundant structures and attractive colors

Wen-Shuai Dong,<sup>a</sup> Hao-Zheng Mei,<sup>a</sup> Jun-Qing Yang,<sup>b</sup> Wen-Li Cao,<sup>a</sup> Yong Hu,<sup>a</sup>

Jian-Guo Zhang<sup>\*a</sup>

<sup>a</sup> *State Key Laboratory of Explosion Science and Technology, Beijing Institute of Technology,  
Beijing 100081, P. R. China.*

<sup>b</sup> *School of Mechanical Engineering, Nanjing University of Science and Technology, Nanjing,  
210094, P. R. China.*

|                                                                                     |      |
|-------------------------------------------------------------------------------------|------|
| 1. The method of synthesized tetranitroethane and dipotassium tetranitroethide      | SIII |
| 2. The combustion reactions for calculated the heat of formation ( $\Delta_f H_m$ ) | SIV  |
| 3. The crystallographic data                                                        | SV   |
| 4. The FT-IR spectra                                                                | SXI  |

## 1. The method of synthesized tetranitroethane and dipotassium tetranitroethide

Dipotassium Tetranitroethide (EP-3). Tetraiodoethylene powder (20.0 g, 0.04 mol) was added to 50 ml of 96% HNO<sub>3</sub> in 0°C, with stirring. Then the solution heated quickly to 70°C. After 20 min, the mixture was poured onto 200 g of ice, and extracted with dichloromethane (100 mL). The solution was washed with NaHSO<sub>3</sub> solution (50 mL), brine (100 mL) and dried (MgSO<sub>4</sub>). Removal of solvent gave 1,1-diiododinitroethylene, 8 g (50%) of a yellow solid. The solution of 1,1-diiododinitroethylene (8.0 g) in 50 mL of 60% aqueous methanol was added to a solution of KNO<sub>2</sub> (8.0 g) in 50 mL of 60% aqueous methanol. After 18h, the product, 5.5 g (90%), was gave by filtered and washed with methanol. Dipotassium tetranitroethide is a bright yellow solid, mp. 280°C. IR (KBr, cm<sup>-1</sup>): 3446, 1534, 1472, 1385, 1349, 1261, 1197, 1141, 1007, 851, 796, 774, 727, 626 cm<sup>-1</sup>. EA (K<sub>2</sub>C<sub>2</sub>N<sub>4</sub>O<sub>8</sub>, 286.24, %): calcd C, 8.39; N, 19.57. found: C, 8.35; N, 19.58.

Tetranitroethane (TNE). Concentrated sulfuric acid (10 mL) was added to a suspension of dipotassium tetranitroethide (4 mmol, 1.1 g) dichloromethane (30 mL) at -40°C and stirred for 1 h. Then the mixture was treated by a quick separation using a separating funnel, which gave the solution of tetranitroethane in dichloromethane.

## 2. The combustion reactions for calculated the heat of formation ( $\Delta_f H_m$ )

The combustion reaction equation of the compounds EP-1-EP-9 might be as follows:

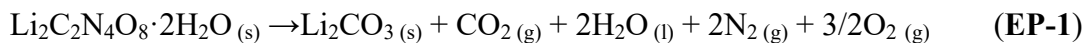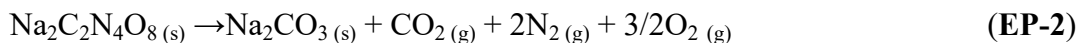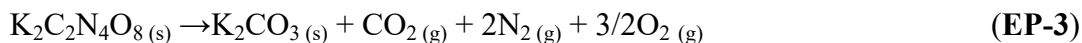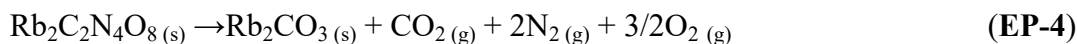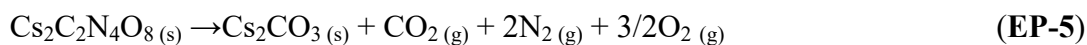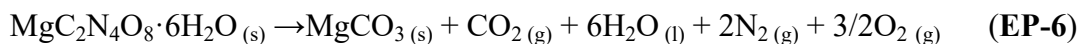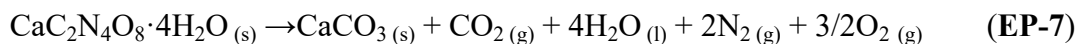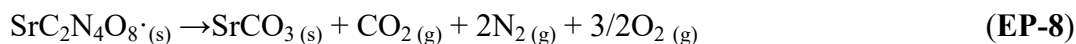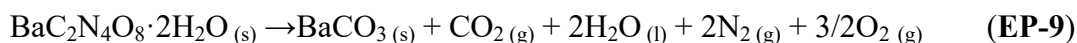

### 3. The crystallographic data

Table S1 Crystallographic data and structure determination details for **EP-1**, **EP-2** and **EP-5**.

| Compound                        | EP-1                                                                         | EP-2                                                         | EP-5                                                         |
|---------------------------------|------------------------------------------------------------------------------|--------------------------------------------------------------|--------------------------------------------------------------|
| Chemical formula                | Li <sub>2</sub> C <sub>2</sub> H <sub>4</sub> N <sub>4</sub> O <sub>10</sub> | Na <sub>2</sub> C <sub>2</sub> N <sub>4</sub> O <sub>8</sub> | Cs <sub>2</sub> C <sub>2</sub> N <sub>4</sub> O <sub>8</sub> |
| Formula weight                  | 258                                                                          | 254                                                          | 474                                                          |
| Crystal size [mm <sup>3</sup> ] | 0.48×0.45×0.30                                                               | 0.13×0.12×0.10                                               | 0.40×0.38×0.36                                               |
| Temperature [K]                 | 298(2)                                                                       | 298(2)                                                       | 298(2)                                                       |
| Crystal system                  | Triclinic                                                                    | Monoclinic                                                   | Monoclinic                                                   |
| Space group                     | <i>P</i> -1                                                                  | <i>C</i> 2/ <i>c</i>                                         | <i>P</i> 2 <sub>1</sub> / <i>c</i>                           |
| a [Å]                           | 7.5837(7)                                                                    | 13.0719(14)                                                  | 8.3059(8)                                                    |
| b [Å]                           | 8.1831(8)                                                                    | 7.6830(7)                                                    | 12.8210(11)                                                  |
| c [Å]                           | 8.5391(8)                                                                    | 9.0648(9)                                                    | 9.6371(9)                                                    |
| α [°]                           | 67.151(2)                                                                    | 90                                                           | 90                                                           |
| β [°]                           | 67.994(3)                                                                    | 107.017(3)                                                   | 97.877(2)                                                    |
| γ [°]                           | 87.638(4)                                                                    | 90                                                           | 90                                                           |
| Volume [Å <sup>3</sup> ]        | 449.38(7)                                                                    | 870.53(15)                                                   | 1016.57(16)                                                  |
| Z                               | 2                                                                            | 4                                                            | 4                                                            |
| ρ [g·cm <sup>-3</sup> ]         | 1.907                                                                        | 1.938                                                        | 3.096                                                        |
| F(000)                          | 260                                                                          | 504                                                          | 856                                                          |
| μ [mm <sup>-1</sup> ]           | 0.193                                                                        | 0.273                                                        | 7.209                                                        |
| θ range (°)                     | 2.72-28.85                                                                   | 2.35-28.44                                                   | 2.66-28.59                                                   |
| Reflections collected           | 2196<br>(R <sub>int</sub> =0.0315)                                           | 2035<br>(R <sub>int</sub> =0.0420)                           | 4970<br>(R <sub>int</sub> =0.0413)                           |
| Independent reflections         | 1530                                                                         | 762                                                          | 1785                                                         |
| parameters                      | 168                                                                          | 73                                                           | 146                                                          |
| S                               | 1.090                                                                        | 1.244                                                        | 1.069                                                        |
| Index ranges                    | -7≤h≤9<br>-9≤k≤9<br>-10≤l≤9                                                  | -15≤h≤15<br>-5≤k≤9<br>-10≤l≤9                                | -9≤h≤9<br>-11≤k≤15<br>-11≤l≤11                               |
| Final R indexes [I>2σ(I)]       | R <sub>1</sub> =0.0434<br>wR <sub>2</sub> =0.1261                            | R <sub>1</sub> =0.0520<br>wR <sub>2</sub> =0.1633            | R <sub>1</sub> =0.0285<br>wR <sub>2</sub> =0.0660            |
| Final R indexes (all data)      | R <sub>1</sub> =0.0471<br>wR <sub>2</sub> =0.1287                            | R <sub>1</sub> =0.0575<br>wR <sub>2</sub> =0.1670            | R <sub>1</sub> =0.0342<br>wR <sub>2</sub> =0.0680            |
| CCDC number                     | 2087207                                                                      | 2093580                                                      | 2102271                                                      |

Table S2 Crystallographic data and structure determination details for EP-6-EP-9.

| Compound                        | EP-6                                                            | EP-7                                                           | EP-8                                              | EP-9                                                           |
|---------------------------------|-----------------------------------------------------------------|----------------------------------------------------------------|---------------------------------------------------|----------------------------------------------------------------|
| Chemical formula                | MgC <sub>2</sub> H <sub>12</sub> N <sub>4</sub> O <sub>14</sub> | CaC <sub>2</sub> H <sub>8</sub> N <sub>4</sub> O <sub>12</sub> | SrC <sub>2</sub> N <sub>4</sub> O <sub>8</sub>    | BaC <sub>2</sub> H <sub>4</sub> N <sub>4</sub> O <sub>10</sub> |
| Formula weight                  | 340                                                             | 320                                                            | 296                                               | 382                                                            |
| Crystal size [mm <sup>3</sup> ] | 0.45×0.30×0.14                                                  | 0.45×0.36×0.30                                                 | 0.20×0.18×0.13                                    | 0.40×0.38×0.30                                                 |
| Temperature [K]                 | 298(2)                                                          | 153(3)                                                         | 298(2)                                            | 298(2)                                                         |
| Crystal system                  | Triclinic                                                       | Tetragonal                                                     | Cubic                                             | Monoclinic                                                     |
| Space group                     | <i>P</i> -1                                                     | <i>I</i> 4 <sub>1</sub> / <i>a</i>                             | <i>Pn</i> -3 <i>m</i>                             | <i>P</i> 2 <sub>1</sub> / <i>c</i>                             |
| a [Å]                           | 7.4376(7)                                                       | 10.6341(9)                                                     | 11.3702(4)                                        | 7.1144(7)                                                      |
| b [Å]                           | 7.5291(8)                                                       | 10.6341(9)                                                     | 11.3702(4)                                        | 8.3556(8)                                                      |
| c [Å]                           | 11.9971(11)                                                     | 9.4640(8)                                                      | 11.3702(4)                                        | 15.7942(14)                                                    |
| α [°]                           | 94.007(10)                                                      | 90                                                             | 90                                                | 90                                                             |
| β [°]                           | 106.366(3)                                                      | 90                                                             | 90                                                | 91.225(2)                                                      |
| γ [°]                           | 94.166(2)                                                       | 90                                                             | 90                                                | 90                                                             |
| Volume [Å <sup>3</sup> ]        | 640.02(11)                                                      | 1070.23(16)                                                    | 1469.96(9)                                        | 938.67(15)                                                     |
| Z                               | 2                                                               | 4                                                              | 2                                                 | 2                                                              |
| ρ [g·cm <sup>-3</sup> ]         | 1.767                                                           | 1.987                                                          | 1.806                                             | 2.699                                                          |
| F(000)                          | 352                                                             | 656                                                            | 776                                               | 720                                                            |
| μ [mm <sup>-1</sup> ]           | 0.228                                                           | 0.668                                                          | 3.739                                             | 4.295                                                          |
| θ range (°)                     | 2.765-28.279                                                    | 2.709-28.342                                                   | 4.366-24.754                                      | 2.580-29.018                                                   |
| Reflections collected           | 3146<br>(R <sub>int</sub> =0.0322)                              | 2366<br>(R <sub>int</sub> =0.0473)                             | 1253<br>(R <sub>int</sub> =0.0391)                | 4308<br>(R <sub>int</sub> =0.0451)                             |
| Independent reflections         | 2198                                                            | 473                                                            | 287                                               | 1655                                                           |
| parameters                      | 193                                                             | 44                                                             | 25                                                | 155                                                            |
| S                               | 1.079                                                           | 1.090                                                          | 1.096                                             | 1.153                                                          |
| Index ranges                    | -6≤h≤8<br>-8≤k≤8<br>-14≤l≤14                                    | -12≤h≤5<br>-12≤k≤12<br>-11≤l≤10                                | -8≤h≤7<br>-7≤k≤13<br>-13≤l≤7                      | -5≤h≤8<br>-9≤k≤9<br>-15≤l≤18                                   |
| Final R indexes [I>2σ(I)]       | R <sub>1</sub> =0.0560<br>wR <sub>2</sub> =0.1650               | R <sub>1</sub> =0.0304<br>wR <sub>2</sub> =0.0810              | R <sub>1</sub> =0.0354<br>wR <sub>2</sub> =0.0947 | R <sub>1</sub> =0.0312<br>wR <sub>2</sub> =0.0764              |
| Final R indexes (all data)      | R <sub>1</sub> =0.0657<br>wR <sub>2</sub> =0.1743               | R <sub>1</sub> =0.0322<br>wR <sub>2</sub> =0.0798              | R <sub>1</sub> =0.0543<br>wR <sub>2</sub> =0.1093 | R <sub>1</sub> =0.0343<br>wR <sub>2</sub> =0.0778              |
| CCDC number                     | 2093662                                                         | 2093741                                                        | 2094065                                           | 2093792                                                        |

#### 4. The FT-IR spectra.

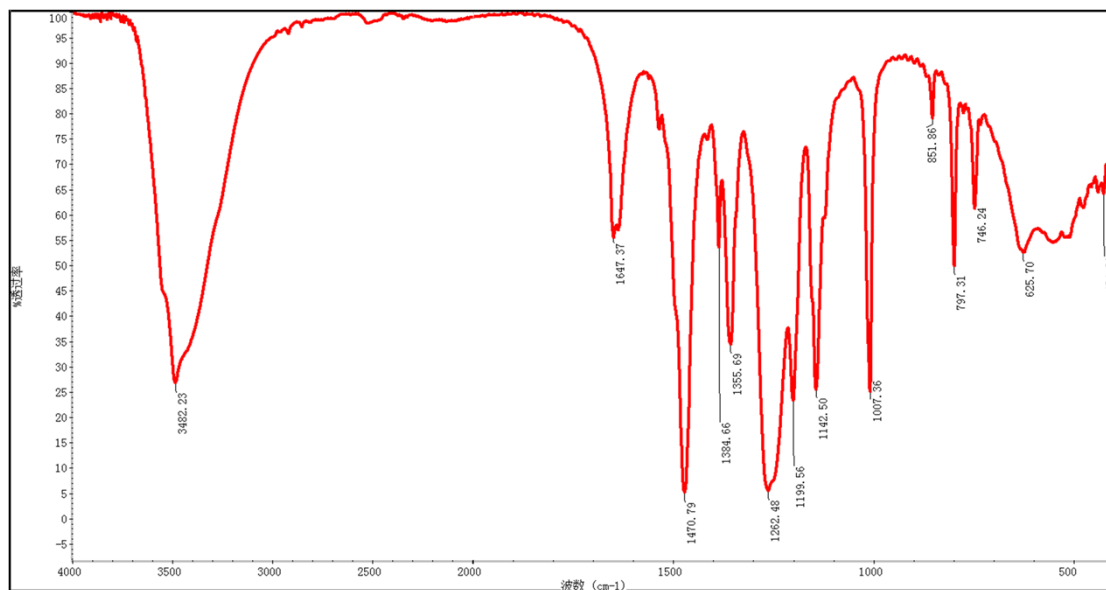

Figure S1 FT-IR spectra of salts EP-1.

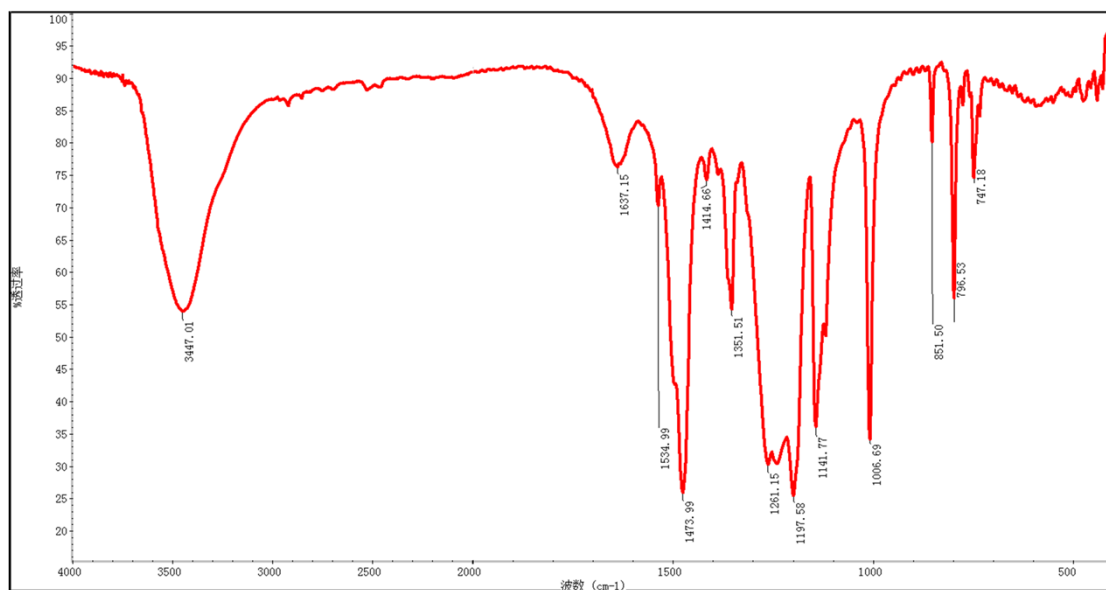

Figure S2 FT-IR spectra of salts EP-2.

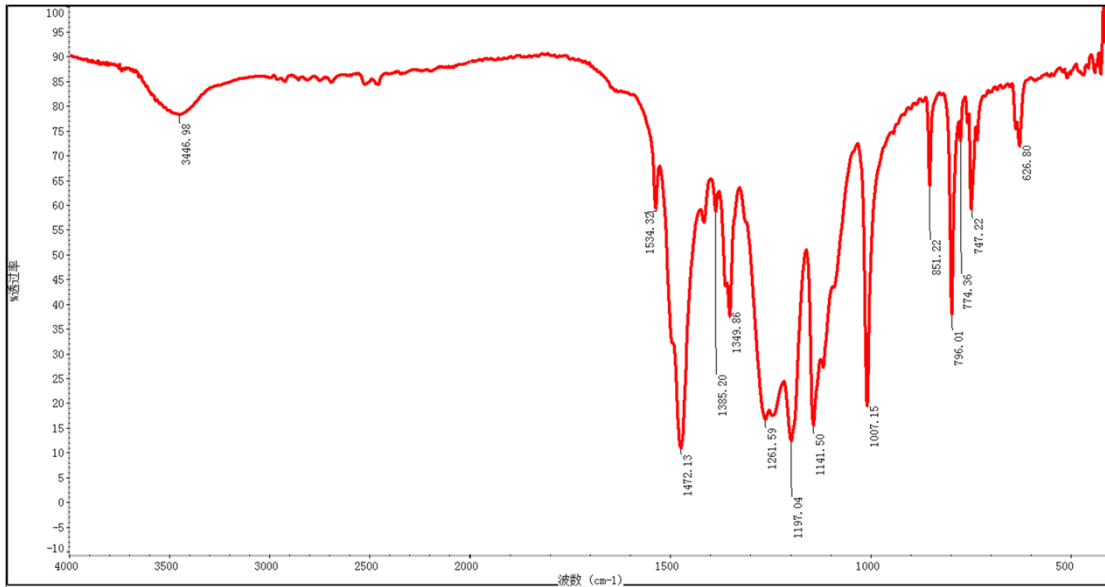

Figure S3 FT-IR spectra of EP-3.

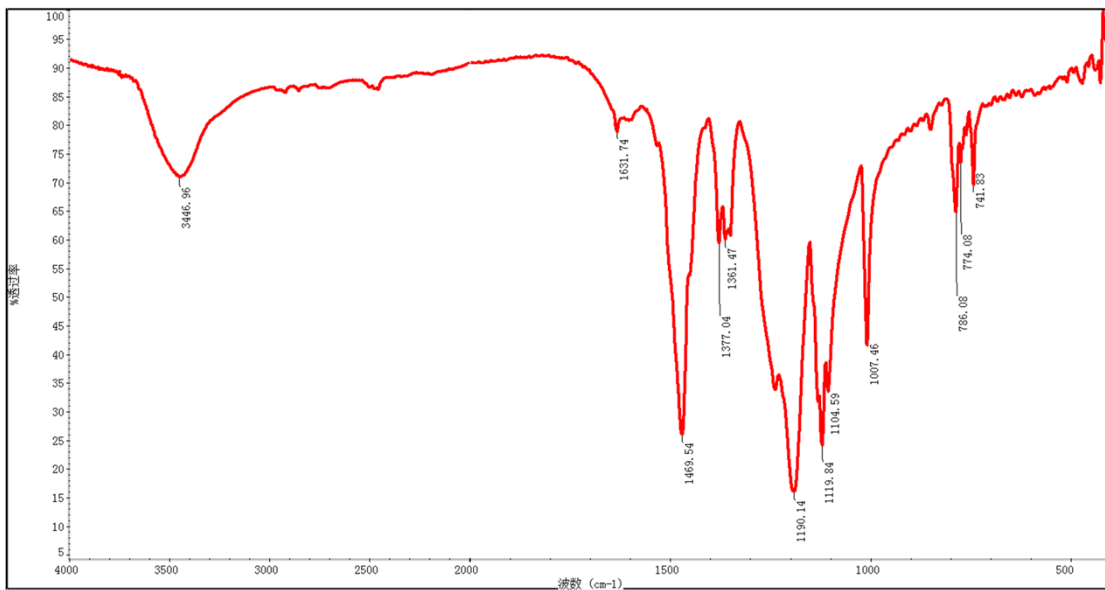

Figure S4 FT-IR spectra of salts EP-4.

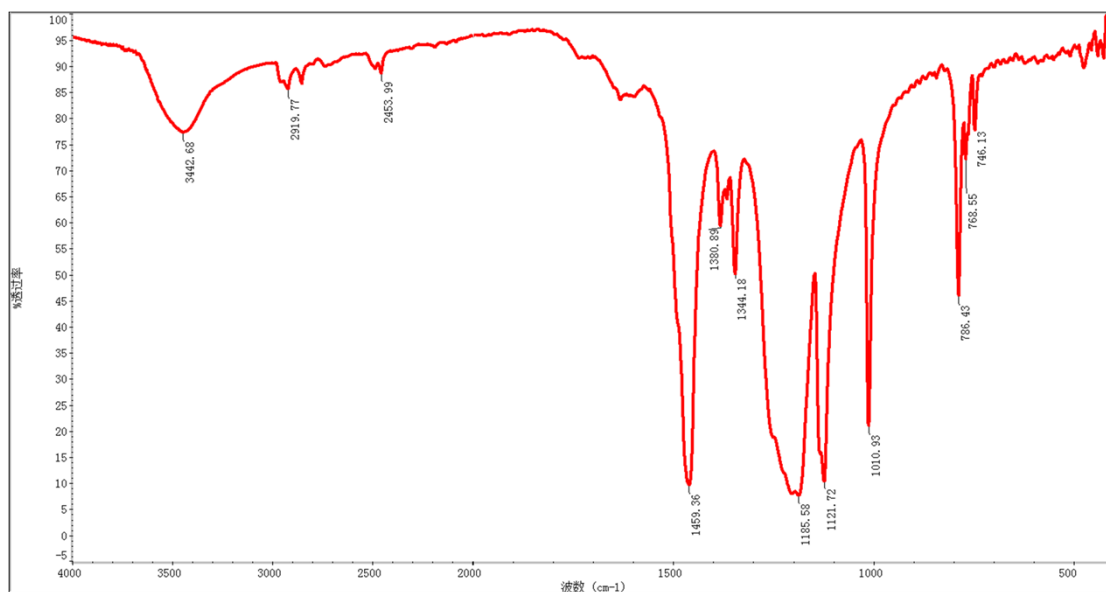

Figure S5 FT-IR spectra of salts **EP-5**.

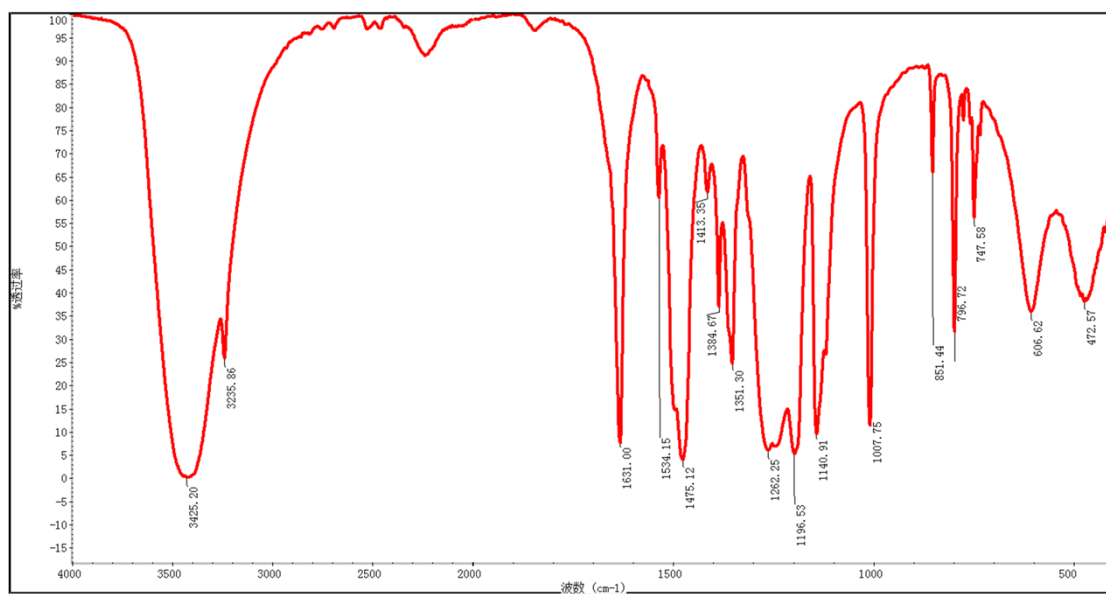

Figure S6 FT-IR spectra of **EP-6**.



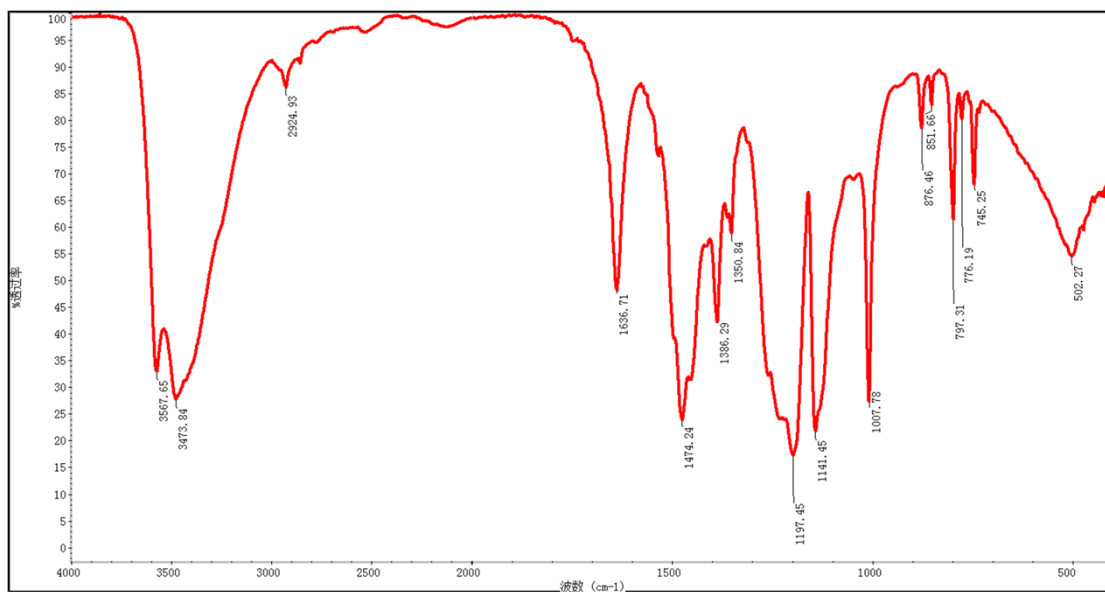

Figure S7 FT-IR spectra of EP-7.

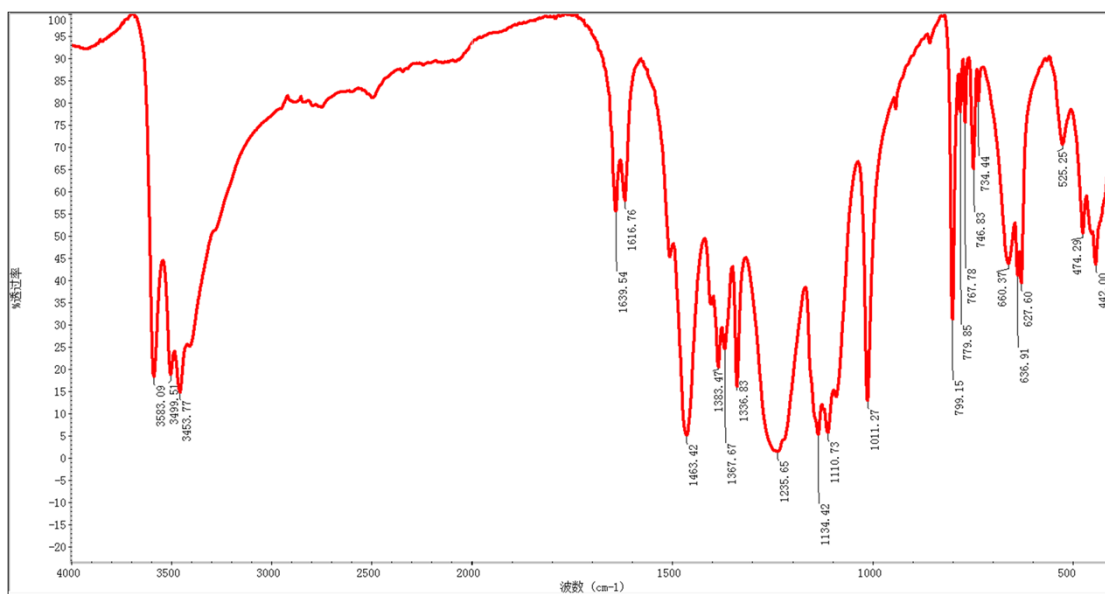

Figure S8 FT-IR spectra of EP-8.

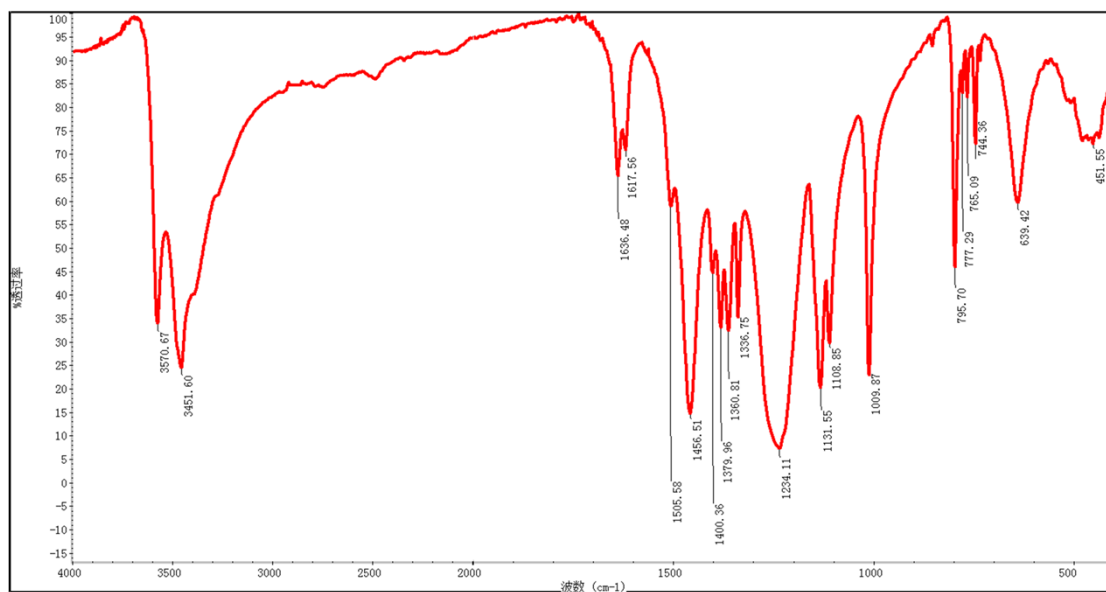

Figure S9 FT-IR spectra of **EP-9**.
